# Supplementary material
Source: PubMed Central journal article supplement (PMC2465535)
Supplement: supp_60_1_62__1.pdf [file supp_60_1_62__1.pdf]

**APPENDIX TABLE (FOR REVIEW-PURPOSES ONLY) -Trends in inequality in infant and child mortality by socio-economic and regional groups, Indonesia, 1982-1997**

|                         | 1982-87 |        |      | 1986-91 |        |      | 1989-94 |        |      | 1992-97 |        |      | trend-estimate [d] | 95% CI |      |
|-------------------------|---------|--------|------|---------|--------|------|---------|--------|------|---------|--------|------|--------------------|--------|------|
|                         | HR      | 95% CI |      | HR      | 95% CI |      | HR      | 95% CI |      | HR      | 95% CI |      |                    |        |      |
| <b>Infant mortality</b> |         |        |      |         |        |      |         |        |      |         |        |      |                    |        |      |
| Maternal education [a]  | 1.80    | 1.40   | 2.32 | 1.53    | 1.30   | 1.79 | 1.43    | 1.14   | 1.80 | 1.42    | 1.15   | 1.74 | 0.88               | 0.67   | 1.16 |
| Household wealth [a]    | 1.78    | 1.43   | 2.23 | 1.44    | 1.17   | 1.77 | 1.51    | 1.22   | 1.85 | 1.44    | 1.14   | 1.83 | 0.87               | 0.64   | 1.19 |
| Community type [b]      | 1.82    | 1.38   | 2.39 | 1.60    | 1.26   | 2.04 | 2.00    | 1.48   | 2.70 | 1.97    | 1.50   | 2.60 | 1.21               | 0.86   | 1.71 |
| Island group [c]        | 1.08    | 0.81   | 1.43 | 0.92    | 0.76   | 1.11 | 1.13    | 0.93   | 1.38 | 1.31    | 1.04   | 1.64 | 1.24               | 0.91   | 1.70 |
| <b>Child mortality</b>  |         |        |      |         |        |      |         |        |      |         |        |      |                    |        |      |
| Maternal education [a]  | 2.59    | 1.82   | 3.69 | 2.22    | 1.65   | 3.00 | 2.00    | 1.53   | 2.63 | 2.04    | 1.42   | 2.94 | 0.94               | 0.62   | 1.41 |
| Household wealth [a]    | 1.57    | 1.14   | 2.17 | 1.59    | 1.18   | 2.14 | 2.85    | 2.02   | 4.00 | 2.26    | 1.56   | 3.29 | 1.75               | 1.14   | 2.68 |
| Community type [b]      | 1.98    | 1.32   | 2.96 | 1.67    | 1.11   | 2.52 | 2.98    | 1.92   | 4.61 | 3.16    | 1.97   | 5.07 | 1.84               | 1.09   | 3.11 |
| Island group [c]        | 1.35    | 0.95   | 1.91 | 1.29    | 0.94   | 1.77 | 1.44    | 1.08   | 1.92 | 2.10    | 1.40   | 3.13 | 1.36               | 0.89   | 2.07 |

[a] Comparing the two lowest with the two highest categories.

[b] Comparing 'not electrified rural' with urban.

[c] Comparing Outer Islands with Java/Bali.

[d] The trend estimates give the (multiplying)factor with which the Hazard Ratio changes between 1987 and 1997 when modeling a linear time-trend in effect using data from all four surveys.
